# Supplementary material for: Using water stable isotopes to understand evaporation, moisture stress, and re-wetting in catchment forest and grassland soils of the summer drought of 2018
Source: Copernicus journal article supplement (doi:10.5194/hess-24-3737-2020), 2020-07-23
Supplement: Supplementary file 1 [file hess-24-3737-2020-supplement.pdf]

Supplement of Hydrol. Earth Syst. Sci., 24, 3737–3752, 2020  
<https://doi.org/10.5194/hess-24-3737-2020-supplement>  
© Author(s) 2020. This work is distributed under  
the Creative Commons Attribution 4.0 License.

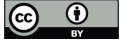

*Supplement of*

## **Using water stable isotopes to understand evaporation, moisture stress, and re-wetting in catchment forest and grassland soils of the summer drought of 2018**

**Lukas Kleine et al.**

*Correspondence to:* Lukas Kleine (l.kleine@igb-berlin.de)

The copyright of individual parts of the supplement might differ from the CC BY 4.0 License.

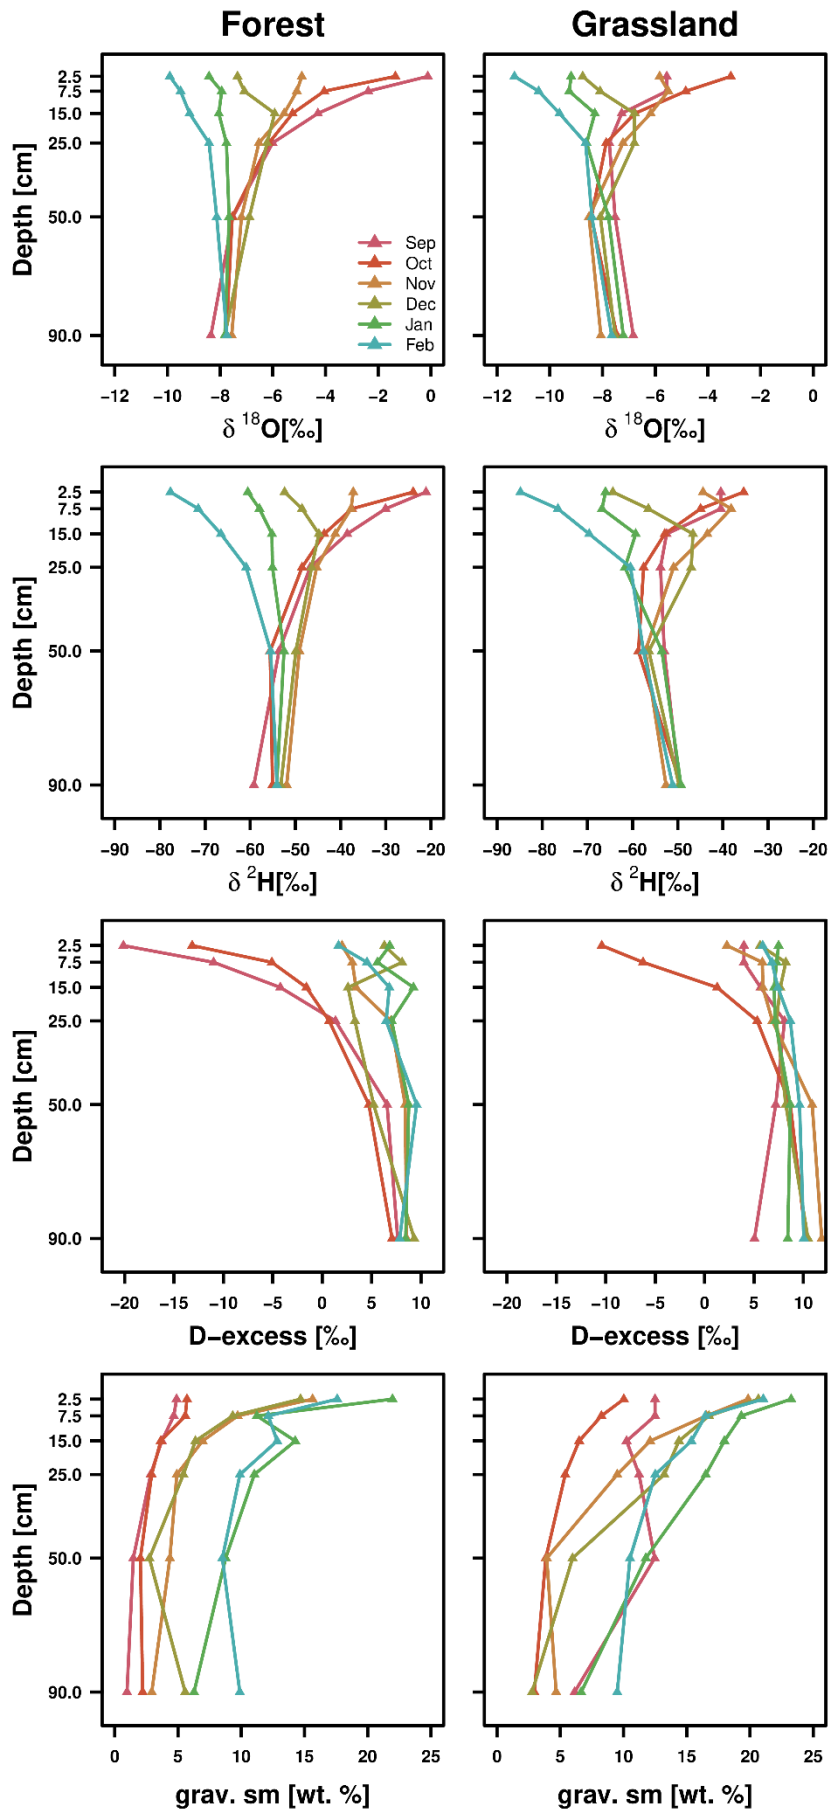

**Figure S1.** Soil profiles of water stable isotope  $\delta$ -values, d-excess and gravimetric soil moisture at the forested (left) and grassland (right) site.
